# Supplementary material for: A pooling-based genome-wide analysis identifies new potential candidate genes for atopy in the European Community Respiratory Health Survey (ECRHS)
Source: PubMed Central journal article supplement (PMC2797505; doi:10.1186/1471-2350-10-128), 2009-12-06
Supplement: 1471-2350-10-128-s1-2.pdf [file 1471-2350-10-128-s1-2.pdf]

## Additional tables

### **Additional table S1 - SNPs associated with asthma or atopy with a FDR of 5% and the surrounding region in the pooling based GWA.**

| Comparison         | Chromosome      | Size                        | Saturation               | SNP              | Position (build 36)          | p value                    | Region          |
|--------------------|-----------------|-----------------------------|--------------------------|------------------|------------------------------|----------------------------|-----------------|
| Atopy vs. controls | 1               | 113 kb                      | No                       | rs627897         | 178153748                    | 0.5775                     | <i>TOR1AIP1</i> |
|                    |                 |                             |                          | rs507603         | 178163693                    | 0.0218                     |                 |
|                    |                 |                             |                          | rs2777910        | 178167601                    | 0.0070                     |                 |
|                    |                 |                             |                          | rs561233         | 178173523                    | 0.0173                     |                 |
|                    |                 |                             |                          | rs2501621        | 178211524                    | 7.5x10 <sup>-5</sup>       | <i>CEP350</i>   |
|                    |                 |                             |                          | <b>rs2501618</b> | <b>178225432</b>             | <b>1.3x10<sup>-7</sup></b> | <b>CEP350</b>   |
|                    |                 |                             |                          | rs2477106        | 178231760                    | 5.3x10 <sup>-5</sup>       | <i>CEP350</i>   |
|                    |                 |                             |                          | rs4076449        | 178263641                    | 0.0119                     | <i>CEP350</i>   |
|                    |                 |                             |                          | rs12125245       | 178267165                    | 0.1956                     | <i>CEP350</i>   |
|                    |                 |                             |                          | 2                | 32 kb                        | Yes                        | rs10184755      |
| rs11124858         | 42113828        | 0.0137                      |                          |                  |                              |                            |                 |
| rs729559           | 42126488        | 1.1 x10 <sup>-5</sup>       |                          |                  |                              |                            |                 |
| <b>rs4952590</b>   | <b>42130425</b> | <b>4.6 x10<sup>-7</sup></b> | <b>SGK493 (LOC91461)</b> |                  |                              |                            |                 |
| rs1440099          | 42144541        | 0.1391                      |                          |                  |                              |                            |                 |
| 5                  | 126 kb          | No                          | rs7443674                | 20868696         | 0.3347                       | Segmental Dups             |                 |
|                    |                 |                             | rs10079831               | 20914020         | 0.0085                       | Segmental Dups             |                 |
|                    |                 |                             | <b>rs9292961</b>         | <b>20975886</b>  | <b>5.3 x10<sup>-7</sup></b>  | <b>Segmental Dups</b>      |                 |
|                    |                 |                             | rs3913348                | 20983113         | 0.0377                       |                            |                 |
|                    |                 |                             | rs1979833                | 20989186         | 0.0156                       |                            |                 |
|                    |                 |                             | rs12186507               | 20994575         | 0.4109                       |                            |                 |
| 6                  | 39 kb           | Yes                         | rs1011969                | 137020933        | 0.0562                       | <i>MAP3K5 (ASK1)</i>       |                 |
|                    |                 |                             | rs3765259                | 137031976        | 0.0119                       | <i>MAP3K5 (ASK1)</i>       |                 |
|                    |                 |                             | <b>rs9376221</b>         | <b>137034072</b> | <b>3.9 x10<sup>-7</sup></b>  | <b>MAP3K5 (ASK1)</b>       |                 |
|                    |                 |                             | rs9402839                | 137036903        | 0.0234                       | <i>MAP3K5 (ASK1)</i>       |                 |
|                    |                 |                             | rs1009709                | 137059442        | 0.1737                       | <i>MAP3K5 (ASK1)</i>       |                 |
| 8                  | 199 kb          | Yes                         | rs12549251               | 33124129         | 0.1638                       | NT_007995.49               |                 |
|                    |                 |                             | rs6991314                | 33168920         | 0.0248                       | NT_007995.50               |                 |
|                    |                 |                             | rs7845697                | 33230933         | 0.00145                      | NT_007995.50               |                 |
|                    |                 |                             | <b>rs7843085</b>         | <b>33235086</b>  | <b>3.93 x10<sup>-7</sup></b> | <b>NT_007995.50</b>        |                 |

|                     |    |       |     |                   |                  |                              |                                |
|---------------------|----|-------|-----|-------------------|------------------|------------------------------|--------------------------------|
|                     |    |       |     | <b>rs13273924</b> | <b>33246541</b>  | <b>7.5 x10<sup>-7</sup></b>  | <b>NT_007995.50</b>            |
|                     |    |       |     | rs6468154         | 33264445         | 0.0029                       | NT_007995.50                   |
|                     |    |       |     | rs10954906        | 33298381         | 0.03334                      |                                |
|                     |    |       |     | rs1996363         | 33323268         | 0.61445                      | NT_007995.51                   |
|                     | 21 | 38 kb | Yes | rs7278425         | 45750979         | 0.0580                       | <i>COL18A1</i>                 |
|                     |    |       |     | rs12483377        | 45755537         | 0.0418                       | <i>COL18A1</i>                 |
|                     |    |       |     | rs7499            | 45756756         | 0.0170                       | <i>COL18A1</i>                 |
|                     |    |       |     | rs3788190         | 45761386         | 0.0126                       | <i>SLC19A1</i>                 |
|                     |    |       |     | rs2838956         | 45769452         | 0.0002                       | <i>SLC19A1</i>                 |
|                     |    |       |     | <b>rs2330183</b>  | <b>45777720</b>  | <b>1.59 x10<sup>-7</sup></b> | <b><i>SLC19A1</i></b>          |
|                     |    |       |     | rs1051266         | 45782222         | 0.0029                       | <i>SLC19A1</i>                 |
|                     |    |       |     | rs3788205         | 45788806         | 0.1125                       |                                |
| Asthma vs. controls | 3  | 42 kb | Yes | rs9875499         | 131631200        | 0.2845                       | <i>COL29A1 (COL6A5)</i>        |
|                     |    |       |     | <b>rs7629719</b>  | <b>131642624</b> | <b>1.2 x10<sup>-7</sup></b>  | <b><i>COL29A1 (COL6A5)</i></b> |
|                     |    |       |     | rs9883988         | 131645085        | 0.0206                       | <i>COL29A1 (COL6A5)</i>        |
|                     |    |       |     | rs819085          | 131657024        | 0.0005                       | <i>COL29A1 (COL6A5)</i>        |
|                     |    |       |     | rs322117          | 131673320        | 0.4556                       | <i>COL29A1 (COL6A5)</i>        |

SNPs marked in bold are the ones that remain significant after 5 % false discovery rate. *CEP350*: centrosomal protein 350kDa; *SGK493*: protein kinase-like protein SgK493; *COL29A1*: collagen, type XXIX, alpha 1; *MAP3K5*: mitogen-activated protein kinase kinase 5; *ASK1*: apoptosis signal-regulating kinase 1; *SLC19A1*: solute carrier family 19 (folate transporter), member 1; *COL18A1*: collagen, type XVIII, alpha 1.

**Additional table S2 - Results of the association between the 53 SNPs and asthma or atopy at an individual level.**

| SNP                | Gene           | MAF          | Chromosome | Position         | Atopy vs. controls        |                           |                             | Atopic asthma subsample vs. controls |               |                            |
|--------------------|----------------|--------------|------------|------------------|---------------------------|---------------------------|-----------------------------|--------------------------------------|---------------|----------------------------|
|                    |                |              |            |                  | Pooling                   | Replication               | Combined                    | Pooling                              | Replication   | Combined                   |
| <b>rs11124858*</b> | <b>SGK493</b>  | <b>0.369</b> | <b>2</b>   | <b>42113827</b>  | <b>0.0021</b>             | <b>0.0317</b>             | <b>0.0007<sup>†</sup></b>   | <b>0.0684</b>                        | <b>0.0666</b> | <b>0.0008<sup>†</sup></b>  |
| <b>rs13409978*</b> | <b>SGK493</b>  | <b>0.123</b> | <b>2</b>   | <b>42119205</b>  | <b>0.0007<sup>†</sup></b> | <b>0.0124</b>             | <b>0.0001<sup>†</sup></b>   | <b>0.0054</b>                        | <b>0.0312</b> | <b>0.0004<sup>†</sup></b>  |
| rs11894613         | SGK493         | 0.276        | 2          | 42121895         |                           |                           | Genotyping under 80%        |                                      |               |                            |
| rs17029121         | SGK493         | 0.269        | 2          | 42123362         | 0.9519                    | 0.8078                    | 0.8212                      | 0.7624                               | 0.5152        | 0.6484                     |
| <b>rs4952590**</b> | <b>SGK493</b>  | <b>0.137</b> | <b>2</b>   | <b>42130424</b>  | <b>0.0001<sup>†</sup></b> | <b>0.0008<sup>†</sup></b> | <b>1.9x10<sup>-6†</sup></b> | <b>0.0052</b>                        | <b>0.0127</b> | <b>3.4x10<sup>-5</sup></b> |
| rs2424             | SGK493         | 0.214        | 2          | 42139078         | 0.4936                    | 0.3135                    | 0.4958                      | 0.5450                               | 0.4572        | 0.3744                     |
| rs12987129         | SGK493         | 0.362        | 2          | 42141431         |                           |                           | Genotyping under 80%        |                                      |               |                            |
| <b>rs1440095</b>   | <b>SGK493</b>  | <b>0.380</b> | <b>2</b>   | <b>42143169</b>  | <b>0.0098</b>             | <b>0.1078</b>             | <b>0.0105</b>               | <b>0.0661</b>                        | <b>0.0385</b> | <b>0.0018</b>              |
| rs16845861         | COL29A1        | 0.217        | 3          | 131581038        | 0.9836                    | 0.2904                    | 0.3336                      | 0.6657                               | 0.2857        | 0.2409                     |
| rs1453241          | COL29A1        | 0.222        | 3          | 131586398        | 0.9829                    | 0.4252                    | 0.4050                      | 0.5530                               | 0.3693        | 0.2569                     |
| rs10212372         | COL29A1        | 0.217        | 3          | 131586895        | 0.9328                    | 0.4223                    | 0.3966                      | 0.6160                               | 0.3703        | 0.2570                     |
| <b>rs10934938</b>  | <b>COL29A1</b> | <b>0.223</b> | <b>3</b>   | <b>131596324</b> | <b>0.1158</b>             | <b>0.0291</b>             | <b>0.0056</b>               | <b>0.7549</b>                        | <b>0.0262</b> | <b>0.0046</b>              |
| rs4688761          | COL29A1        | 0.281        | 3          | 131607678        | 0.4775                    | 0.5082                    | 0.3616                      | 0.7861                               | 0.4720        | 0.2250                     |
| rs4688801          | COL29A1        | 0.074        | 3          | 131631449        | 0.3844                    | 0.8128                    | 0.5813                      | 0.9889                               | 0.7232        | 0.4292                     |
| rs9289373          | COL29A1        | 0.082        | 3          | 131637553        | 0.4965                    | 0.7046                    | 0.5712                      | 0.8211                               | 0.9340        | 0.6802                     |
| rs7629719**        | COL29A1        | 0.059        | 3          | 131642623        | 0.7569                    | 0.5895                    | 0.6534                      | 0.6123                               | 0.8423        | 0.9823                     |
| rs819085*          | COL29A1        | 0.054        | 3          | 131657023        | 0.7569                    | 0.8084                    | 0.7711                      | 0.3056                               | 0.8965        | 0.7830                     |
| rs819084           | COL29A1        | 0.083        | 3          | 131657717        |                           |                           | Genotyping under 80%        |                                      |               |                            |
| rs819080           | COL29A1        | 0.176        | 3          | 131660335        | 0.6432                    | 0.8266                    | 0.9899                      | 0.5522                               | 0.9438        | 0.9723                     |
| rs6791107          | COL29A1        | 0.295        | 3          | 131667481        | 0.8673                    | 0.3725                    | 0.3764                      | 0.9123                               | 0.7131        | 0.5125                     |
| rs322114           | COL29A1        | 0.125        | 3          | 131671837        | 0.9914                    | 0.1570                    | 0.2215                      | 0.2454                               | 0.1660        | 0.2174                     |
| rs322117           | COL29A1        | 0.170        | 3          | 131673319        | 0.7209                    | 0.6677                    | 0.8814                      | 0.9645                               | 0.7288        | 0.8619                     |
| rs2272887          | MAP3K5         | 0.147        | 6          | 137021826        | 0.2740                    | 0.9490                    | 0.4390                      | 0.5125                               | 0.9894        | 0.3207                     |
| rs7773600          | MAP3K5         | 0.185        | 6          | 137026911        | 0.0833                    | 0.4486                    | 0.1054                      | 0.0653                               | 0.6171        | 0.1175                     |
| rs13195420         | MAP3K5         | 0.400        | 6          | 137030727        | 0.7206                    | 0.9375                    | 0.7945                      | 0.5123                               | 0.5894        | 0.4058                     |
| rs3765259*         | MAP3K5         | 0.489        | 6          | 137031975        | 0.3265                    | 0.1260                    | 0.0507                      | 0.3635                               | 0.6918        | 0.4241                     |
| <b>rs9402839*</b>  | <b>MAP3K5</b>  | <b>0.137</b> | <b>6</b>   | <b>137036902</b> | <b>0.0355</b>             | <b>0.0524</b>             | <b>0.0099</b>               | <b>0.6434</b>                        | <b>0.1047</b> | <b>0.0322</b>              |
| rs12198737         | MAP3K5         | 0.070        | 6          | 137037479        | 0.6951                    | 0.6210                    | 0.8993                      | 0.1339                               | 0.3399        | 0.6538                     |

|                    |                |              |           |                  |               |               |                           |               |               |                           |
|--------------------|----------------|--------------|-----------|------------------|---------------|---------------|---------------------------|---------------|---------------|---------------------------|
| <b>rs9494554**</b> | <b>MAP3K5</b>  | <b>0.095</b> | <b>6</b>  | <b>137038674</b> | <b>0.0306</b> | <b>0.0035</b> | <b>0.0004<sup>†</sup></b> | <b>0.3989</b> | <b>0.0023</b> | <b>0.0003<sup>†</sup></b> |
| rs4363056          | MAP3K5         | 0.352        | 6         | 137039311        | 0.2974        | 0.6139        | 0.2691                    | 0.3691        | 0.3535        | 0.8907                    |
| rs11154879         | MAP3K5         | 0.239        | 6         | 137047059        |               |               | HWE deviation             |               |               |                           |
| rs7761896          | MAP3K5         | -            | 6         | 137048808        |               |               | Genotyping failed         |               |               |                           |
| rs1009709          | MAP3K5         | 0.485        | 6         | 137059441        | 0.1803        | 0.9757        | 0.4262                    | 0.9931        | 0.2221        | 0.9499                    |
| rs12549251         | NT_007995.50   | 0.488        | 8         | 33124128         | 0.0612        | 0.1442        | 0.0261                    | 0.3315        | 0.4325        | 0.0447                    |
| rs16880419         | NT_007995.50   | 0.203        | 8         | 33125480         | 0.8517        | 0.7315        | 0.5762                    | 0.4619        | 0.8333        | 0.8287                    |
| rs17757671         | NT_007995.50   | 0.299        | 8         | 33147915         |               |               | HWE deviation             |               |               |                           |
| rs9656760*         | NT_007995.50   | 0.423        | 8         | 33174463         | 0.0831        | 0.2092        | 0.0391                    | 0.1860        | 0.1212        | 0.0203                    |
| rs10808333         | NT_007995.50   | 0.467        | 8         | 33187844         | 0.0168        | 0.9024        | 0.1892                    | 0.2010        | 0.2386        | 0.0387                    |
| rs11778813         | NT_007995.50   | 0.090        | 8         | 33209329         | 0.2914        | 0.2554        | 0.1209                    | 0.3831        | 0.0730        | 0.0221                    |
| rs11984493         | NT_007995.50   | 0.269        | 8         | 33218635         | 0.0387        | 0.9835        | 0.4097                    | 0.9206        | 0.2015        | 0.0399                    |
| rs7843085**        | NT_007995.50   | 0.297        | 8         | 33235085         | 0.0247        | 0.8979        | 0.4243                    | 0.4524        | 0.1579        | 0.0312                    |
| rs13273924**       | NT_007995.50   | 0.331        | 8         | 33246540         | 0.0117        | 0.9470        | 0.2968                    | 0.6208        | 0.1656        | 0.0114                    |
| rs7000239          | NT_007995.50   | -            | 8         | 33257418         |               |               | Genotyping failed         |               |               |                           |
| rs12677799         | NT_007995.50   | 0.366        | 8         | 33266838         | 0.3763        | 0.2675        | 0.5439                    | 0.7191        | 0.2668        | 0.3879                    |
| rs4478533          | NT_007995.50   | 0.491        | 8         | 33268691         | 0.2235        | 0.3038        | 0.8432                    | 0.2253        | 0.3548        | 0.3130                    |
| rs3923524          | NT_007995.50   | 0.346        | 8         | 33288516         | 0.3072        | 0.4134        | 0.7794                    | 0.7551        | 0.2088        | 0.2739                    |
| rs7003617          | NT_007995.50   | 0.206        | 8         | 33311182         | 0.3535        | 0.3722        | 0.7736                    | 0.2713        | 0.2684        | 0.1706                    |
| rs11785888         | NT_007995.50   | 0.206        | 8         | 33322047         | 0.6737        | 0.2474        | 0.4980                    | 0.9951        | 0.7946        | 0.6904                    |
| rs1996363          | NT_007995.50   | 0.128        | 8         | 33323267         | 0.3297        | 0.1643        | 0.0906                    | 0.2439        | 0.2666        | 0.1281                    |
| rs7278425          | COL18A1        | -            | 21        | 45750978         |               |               | Genotyping failed         |               |               |                           |
| rs2838951          | COL18A1        | 0.412        | 21        | 45754147         | 0.5865        | 0.2474        | 0.1554                    | 0.0253        | 0.5041        | 0.5845                    |
| <b>rs12483377*</b> | <b>COL18A1</b> | <b>0.103</b> | <b>21</b> | <b>45755536</b>  | <b>0.0047</b> | <b>0.0607</b> | <b>0.0030</b>             | <b>0.3047</b> | <b>0.3392</b> | <b>0.0311</b>             |
| rs2330183**        | SLC19A1        | 0.424        | 21        | 45777719         | 0.5685        | 0.7021        | 0.4318                    | 0.0025        | 0.3166        | 0.2428                    |
| rs3788205          | SLC19A1        | 0.287        | 21        | 45788805         | 0.68389       | 0.4089        | 0.3354                    | 0.2206        | 0.2985        | 0.3048                    |

SNPs in bold are the positive ones, listed in Table 1. SNPs marked with asterisk are the ones found associated in the GWA using pools or their perfect tags ( $r^2 \geq 0.8$ ) used as substitutes in the genotyping design. Minor allele frequency calculated in the combination of both samples, using control and atopic subjects. \* SNPs found associated in the pooling-based GWA. \*\* SNPs that remained significant after a 5 % FDR in the pooling-based GWA. <sup>†</sup> SNPs that remain significant after Bonferroni correction ( $p \leq 0.001$ ). *SGK493*: protein kinase-like protein SgK493; *COL29A1*: collagen, type XXIX, alpha 1; *MAP3K5*: mitogen-activated protein kinase kinase kinase 5.

**Additional table S3 - Statistical power calculation for replication using Quanto software v1.2.4 (<http://hydra.usc.edu/gxe>) for significance (two-sided) of 0.05 and additive genetic model.**

| SNP         | Gene    | Parameters from individual samples from DNA pooling |            | A priori power |       | Effective power |       |
|-------------|---------|-----------------------------------------------------|------------|----------------|-------|-----------------|-------|
|             |         | MAF                                                 | Odds Ratio | Case/control   | Power | Case/control    | Power |
| rs11124858* | SGK493  | 0.367                                               | 0.43       | 429/222        | 0.99  | 331/178         | 0.99  |
| rs13409978* | SGK493  | 0.122                                               | 0.22       | 429/222        | 0.99  | 334/178         | 0.99  |
| rs4952590** | SGK493  | 0.141                                               | 0.18       | 429/222        | 0.99  | 317/163         | 0.99  |
| rs1440095   | SGK493  | 0.379                                               | 0.50       | 429/222        | 0.99  | 333/172         | 0.99  |
| rs10934938  | COL29A1 | 0.23                                                | 0.57       | 429/222        | 0.96  | 296/150         | 0.87  |
| rs9402839*  | MAP3K5  | 0.138                                               | 2.39       | 429/222        | 0.99  | 314/166         | 0.99  |
| rs9494554** | MAP3K5  | 0.095                                               | 2.47       | 429/222        | 0.99  | 329/175         | 0.99  |
| rs12483377* | COL18A1 | 0.108                                               | 4.11       | 429/222        | 0.99  | 282/137         | 0.99  |

\*SNPs found associated in the pooling-based GWA or their perfect tags ( $r^2 \geq 0.8$ ) used as substitutes in the genotyping design.

\*\*SNPs that remained significant after a 5 % FDR in the pooling-based GWA

**Additional figure S1 - Linkage disequilibrium pattern for the HapMap CEPH population of the region flanking SGK493 gene (10 kb at 5' and 3') based on the method of Gabriel et al. [1] implemented in Haploview.**

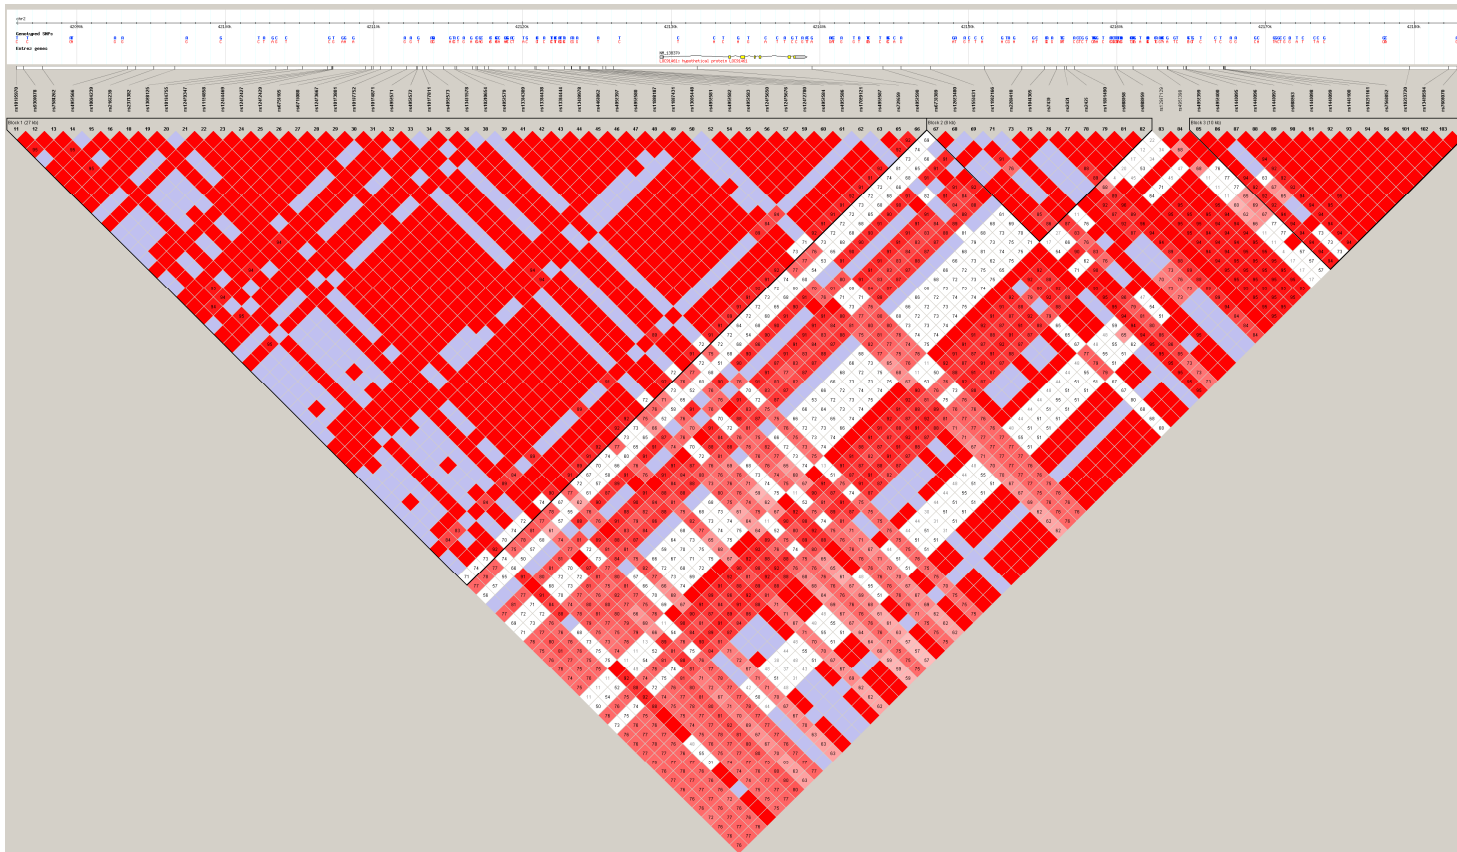

1. Gabriel SB, Schaffner SF, Nguyen H, Moore JM, Roy J, Blumenstiel B *et al.*: **The structure of haplotype blocks in the human genome.** *Science* 2002, 296: 2225-2229.
